# Supplementary material
Source: Springer Nature journal article supplement (https://www.springermedizin.de/resource/supplementary/12884_2012_709_MOESM1_ESM.pdf/9458538)
Supplement: MOESM1 [file 9458538]

A midwife assesses a woman's smoking status, at the booking appointment, using self-report and the CO test.

Woman self-reports as a smoker and the CO test shows green, amber or red reading  
**OR**  
Woman self-reports as a non-smoker but the CO test gives an amber or red reading

The midwife informs the woman of the financial incentive scheme and that she will be contacted by the stop smoking service (SSS).

**If a woman agrees**, her details are sent to the SSS

**If a woman declines**, midwives mark that she has opted out and she is not contacted about the financial incentive scheme.

The SSS support worker contacts all women referred to ascertain interest in taking part in the scheme and offers them standard stop smoking support.

**If a woman is interested** in the incentive scheme an enrolment visit is set up with the support worker.

**If a woman is not interested** in the scheme she is not enrolled and not contacted again.

**Enrolment Visit:** A urine sample is obtained.

If the urine sample has a test result of **at least 1.5mg/ml**, informed consent is obtained and the woman is given a 'programme passport' with her visit schedule.

If the urine sample has a test result of **less than 1.5mg/ml** a woman is not enrolled onto the scheme.
